# Supplementary material for: A dual pH/ROS-sensitive nanoplatform blocking NETs formation and co-delivering paclitaxel for potent therapeutic efficacy against triple-negative breast cancer and lung metastasis
Source: Royal Society of Chemistry journal article supplement (doi:10.1039/d5nr04757a), 2025-12-23
Supplement: d5nr04757a1.pdf [file d5nr04757a1.pdf]

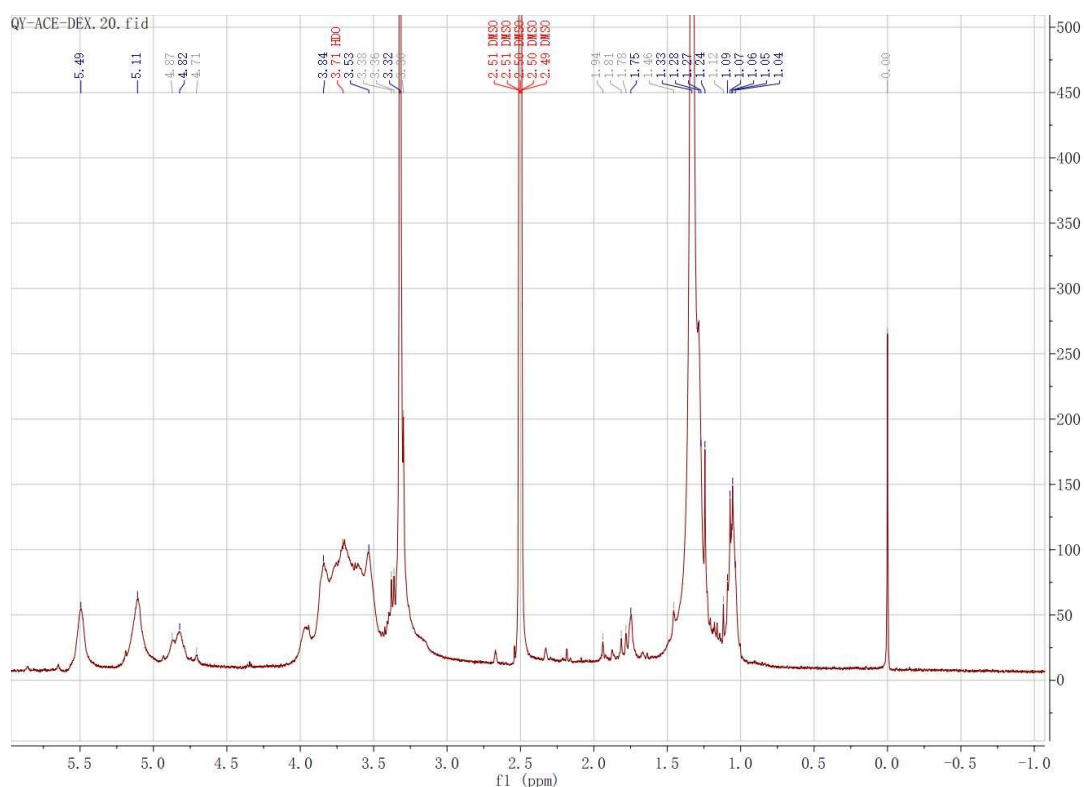

**Figure S1. NMR hydrogen spectra of Ace-DEX.** The successful reaction of DEX with 2-ethoxypropene was confirmed by  $^1\text{H}$  NMR spectroscopy. In the spectrum, the signal at  $\delta = 4.9$  ppm is assigned to the anomeric proton on the DEX pyranose ring. The multiplet in the range of  $\delta = 3.42$ - $3.92$  ppm corresponds to the protons on the main chain and the  $-\text{CH}_2-$  groups of the side chains. Characteristically, signals appearing at  $\delta = 1.0$ - $1.5$  ppm are attributed to the  $-\text{CH}_3$  and  $-\text{CH}_2-$  protons from the attached ethoxy functional group. Furthermore, the peak at  $\delta = 4.7$  ppm belongs to the residual signal of the deuterated solvent  $\text{D}_2\text{O}$ , while the peaks at  $\delta = 2.5$  ppm and  $\delta = 3.32$  ppm are characteristic of the solvent  $\text{d}_6$ -DMSO.

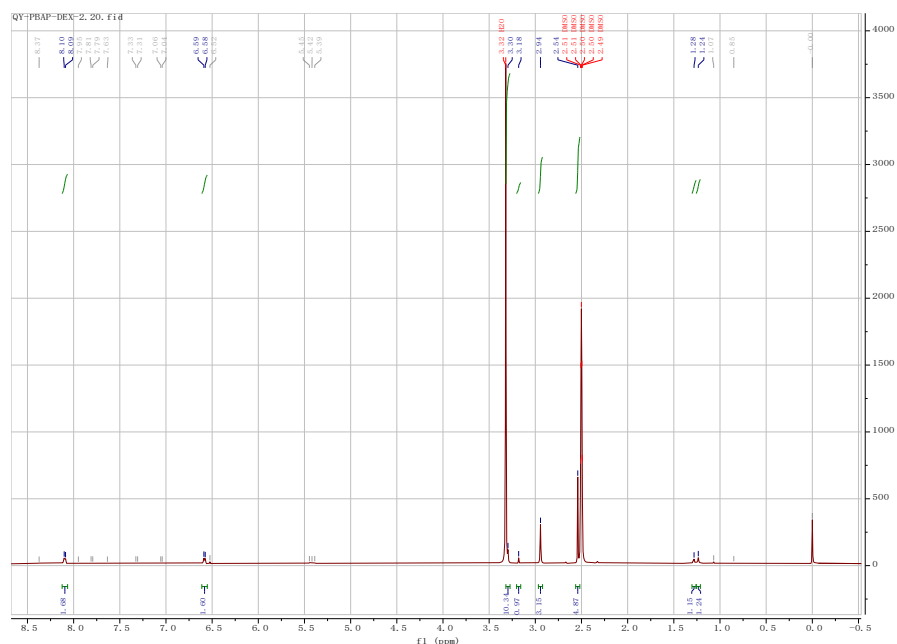

**Figure S2. NMR hydrogen spectra of PBAP-DEX.** The  $^1\text{H}$  NMR spectrum was assigned as follows: the signal at  $\delta = 1.0\text{--}1.5$  ppm corresponds to the  $-\text{CH}_3$  protons of PBAP; the peak at  $\delta = 2.50$  ppm is characteristic of the solvent DMSO; the resonance at  $\delta = 2.94$  ppm is attributed to the  $-\text{CH}_2-$  protons on the main chain; the signal at  $\delta = 3.32$  ppm arises from water ( $\text{H}_2\text{O}$ ); the peak at  $\delta = 6.59$  ppm is assigned to the  $-\text{OH}$  proton on the main chain; and the signal at  $\delta = 8.10$  ppm belongs to the aromatic protons of the PBAP benzene ring.

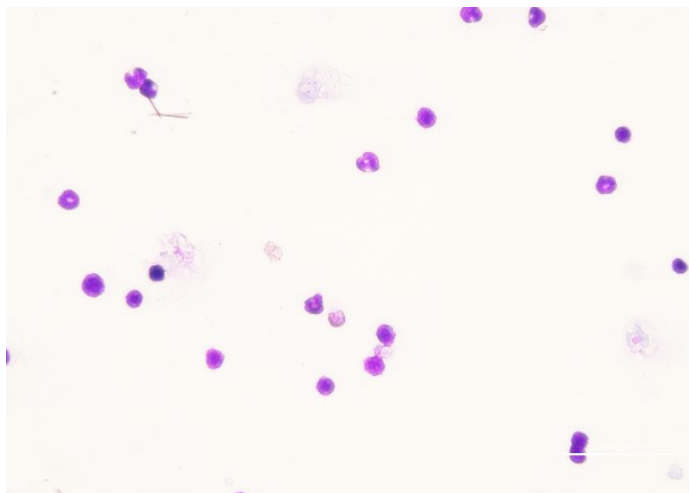

**Figure S3. The morphology of neutrophils was observed by Giemsa staining. Scale bar: 50  $\mu\text{m}$ .**
